1 **One Codex: A Sensitive and Accurate Data Platform for**  
2 **Genomic Microbial Identification**

3 Samuel S. Minot<sup>\*</sup>, Niklas Krumm and Nicholas B. Greenfield

4 One Codex (Reference Genomics, Inc.), San Francisco, California, USA

5 <sup>\*</sup>To whom correspondence should be addressed: [sam@onecodex.com](mailto:sam@onecodex.com)

## 6 1 ABSTRACT

7 High-throughput sequencing (HTS) is increasingly being used for broad applications of microbial char-  
8 acterization, such as microbial ecology, clinical diagnosis, and outbreak epidemiology. However, the  
9 analytical task of comparing short sequence reads against the known diversity of microbial life has  
10 proved to be computationally challenging. The One Codex data platform was created with the dual goals  
11 of analyzing microbial data against the largest possible collection of microbial reference genomes, as  
12 well as presenting those results in a format that is consumable by applied end-users. One Codex identi-  
13 fies microbial sequences using a “*k*-mer based” taxonomic classification algorithm through a web-based  
14 data platform, using a reference database that currently includes approximately 40,000 bacterial, viral,  
15 fungal, and protozoan genomes. In order to evaluate whether this classification method and associated  
16 database provided quantitatively different performance for microbial identification, we created a large  
17 and diverse evaluation dataset containing 50 million reads from 10,639 genomes, as well as sequences  
18 from six organisms novel species not be included in the reference databases of any of the tested classifi-  
19 ers. Quantitative evaluation of several published microbial detection methods shows that One Codex has  
20 the highest degree of sensitivity and specificity (AUC = 0.97, compared to 0.82-0.88 for other methods),  
21 both when detecting well-characterized species as well as newly sequenced, “taxonomically novel” or-  
22 ganisms.

23

## 24 2 INTRODUCTION

25 As the efficiency, accuracy, and speed of high-throughput genomic sequencing (HTS) has continued to  
26 improve, a larger set of microbiologists working in clinical medicine, public health, and industry is  
27 adopting this powerful technology. Public health agencies are already beginning to use HTS to track the  
28 spread of outbreaks (Neimark 2015), and there is an increasing number of applications for which the ex-  
29 quisite precision and accuracy of genome-level identification justifies the (presently) higher marginal

30 per-test cost. However, the broader adoption of HTS by scientists that may lack experience in bioinfor-  
31 matic analysis has created a need for bioinformatic solutions that are accessible for non-experts and pro-  
32 vide high-quality analytical results (Grad 2014; Caboche 2014).

33 Taxonomic classification is the analytical basis of a wide range of applied microbiology supporting ap-  
34 plications in public health, clinical diagnosis, and industrial production. Strain- and species-level taxo-  
35 nomic classification allows a user to identify specific pathogens, perform genomic epidemiology, and  
36 characterize microbial communities that may be associated with a particular phenotype. A variety of al-  
37 gorithms have been developed for such taxonomic classification, including the use of marker gene li-  
38 braries (Segata 2012; Liu 2011), local alignment (Naccache 2014; Mitra 2011), and *k*-mer matching  
39 (Ames 2013; Wood 2014; Břinda 2015; Ounit 2015). *K*-mer-based analysis, the method used by Kraken,  
40 Seed-Kraken, CLARK, and One Codex, identifies short sequences (typically ranging from 17 - 31 bp)  
41 that are unique to specific taxa within a set of input reads. Based on the collection of *k*-mers that are  
42 found in a given read, it can be assigned to a particular taxon. By extension, a sample can be character-  
43 ized according to the proportion of reads that are assigned to different taxa. Using this approach, micro-  
44 bial samples either from isolates or mixed samples can be characterized to the level needed to perform a  
45 large number of tasks needed for public health, clinical diagnosis, and industrial microbiology. As a  
46 public resource for academic data analysis, we believe it is valuable to provide the research community  
47 with a description of the performance and operation of the One Codex platform, while providing the raw  
48 data and analytical details needed to replicate or update such an evaluation as metagenomic methods  
49 continue to improve. In this paper we describe the functioning of One Codex and a rigorous functional  
50 evaluation of the state-of-the-art metagenomic classification methods, including the effect of database  
51 size on classification accuracy.

52

### 53 3 MATERIALS & METHODS

54

### 55 3.1 Taxonomic Classification Algorithm

56 One Codex classifies individual sequence reads according to the set of  $k$ -mers in that read that are  
57 unique to specific taxonomic groups. This analytical approach has been described extensively (Ames  
58 2014; Wood 2014) and is implemented by One Codex using a default value of  $k=31$ . Briefly, each read  
59 is broken into the complete set of overlapping sequences of length 31bp that comprise it. These  $k$ -mers  
60 are compared against an exhaustive database that contains every  $k$ -mer and the taxonomic grouping to  
61 which it is unique (e.g., a specific clade of bacteria, archaea, or viruses). A compressed data structure is  
62 used to index and rapidly search  $k$ -mer databases generated from approximately 40,000 microbial ge-  
63 nomes. Each read can then be summarized as a “ $k$ -mer hit chain” that describes the complete set of taxo-  
64 nomically-informative  $k$ -mers found in that read, as well as their positions. Individual reads are then as-  
65 signed on the basis of the highest weighted taxonomic root-to-leaf path amongst these  $k$ -mer hits. For  
66 example, if a read has  $k$ -mers unique to *Enterobacteriaceae*, *Escherichia*, and *Escherichia coli*, it would  
67 be given the label *E. coli*. However, if it had  $k$ -mers unique to *Enterobacteriaceae*, *Escherichia*, and  
68 *Klebsiella*, it would be given the label *Enterobacteriaceae* – the most specific taxon that encompasses  
69 all detected  $k$ -mers, as *Klebsiella* and *Escherichia* are separate genera of *Enterobacteriaceae*. Finally,  
70 the distribution of reads from a single sample across different organisms and taxa is used to construct a  
71 comprehensive report that displays the organisms present in a sample.

72

### 73 3.2 Classification Accuracy

74 The goal of this evaluation effort was to assess the ability of a suite of bioinformatic methods to assign  
75 nucleotide sequences to the most accurate taxonomic group.

76

### 77           **3.2.1. One Codex Classification**

78   Data were processed on the One Codex platform according to the instructions outlined in Section 2.3 –  
79   One Codex User Interface. One Codex uses two reference databases, the full One Codex database of ap-  
80   proximately 40,000 bacteria, viruses, fungi, archaeal, and protists, and a smaller database containing the  
81   over 8,000 microbial genomes contained in the NCBI RefSeq database. Both the One Codex full data-  
82   base (referred to here as “One Codex”) and the One Codex RefSeq Database represent sequences availa-  
83   ble on July 8, 2015.

84

### 85           **3.2.2. Additional Classification Algorithms**

86   The following metagenomic classification algorithms were downloaded, compiled, and installed accord-  
87   ing to the provided instructions in an Ubuntu environment on standard AWS EC2 instances (r3.8xlarge).  
88   In each case the indicated dependencies were installed as described and default run settings were used,  
89   except in the case of Clark in which the “RAM-light” flag was used in order not exceed system memory  
90   capacity.

- 91   • Metaphlan (2.1.0) - <https://bitbucket.org/biobakery/metaphlan2>
- 92   • GOTTCHA (1.0b) - <https://github.com/poeli/GOTTCHA> (database  
93    GOTTCHA\_BACTERIA\_c3514\_k24\_u2)
- 94   • Kraken (v0.10.5-beta) - <http://ccb.jhu.edu/software/kraken/>
- 95   • Seed-Kraken (seedmod128b\_from\_0.10.6) - <http://seed-kraken.readthedocs.org/>
- 96   • Clark (v1.1.3) – <http://clark.cs.ucr.edu/>

97

### 98           **3.2.3. Additional Classification Databases**

99   Metaphlan is distributed with a complete standalone database. Kraken is distributed with a reduced ref-  
100   erence database (“Minikraken” - Dec. 8, 2014). In addition, we constructed the full Kraken database on  
101   July 5, 2015 according to the instructions provided at  
102   <http://ccb.jhu.edu/software/kraken/MANUAL.html>. Given the contemporaneous snapshot of NCBI, the  
103   genomic content of the full Kraken database is roughly equivalent to that of the One Codex RefSeq Da-  
104   tabase, albeit with some differences in the exact repositories used. The Seed-Kraken database was con-  
105   structed using the same complement of reference genomes as the Kraken database. The Clark bacterial  
106   reference database was constructed on Aug. 21, 2015 using the provided default instructions.

107

### 108           **3.2.4. Test Datasets**

109   Two complementary approaches were employed to test the accuracy of these microbial detection meth-  
110   ods. In the first, 500 sets of simulated reads (100,000 reads each) were generated from complete micro-  
111   bial genomes at a wide range of abundance levels in order to simulate a variety of biological assemblag-  
112   es (Mavromatis 2007). Each read set contained reads from 214 random genomes with roughly 100,000  
113   reads simulated each, and additional reads from 10,425 genomes simulated at much lower abundance (1  
114   – 30,000 reads each) (Figure 1). In total, 50 million reads were simulated from 10,639 genomes to pro-  
115   vide a robust resource for the evaluation of metagenomic analysis methods. In every case, the genome  
116   was selected randomly from the set of complete genomes available in public sequence repositories, re-  
117   gardless of whether they were included in the One Codex database. Approximately 78% of the simulated  
118   genomes were also indexed in the One Codex Database, while 8.8% were indexed in the One Codex  
119   RefSeq Database. Importantly, the taxonomic ID for each read was encoded in the FASTQ header, al-

120 lowing the direct comparison of the known source of each sequence against the taxonomic prediction  
121 made by each method.

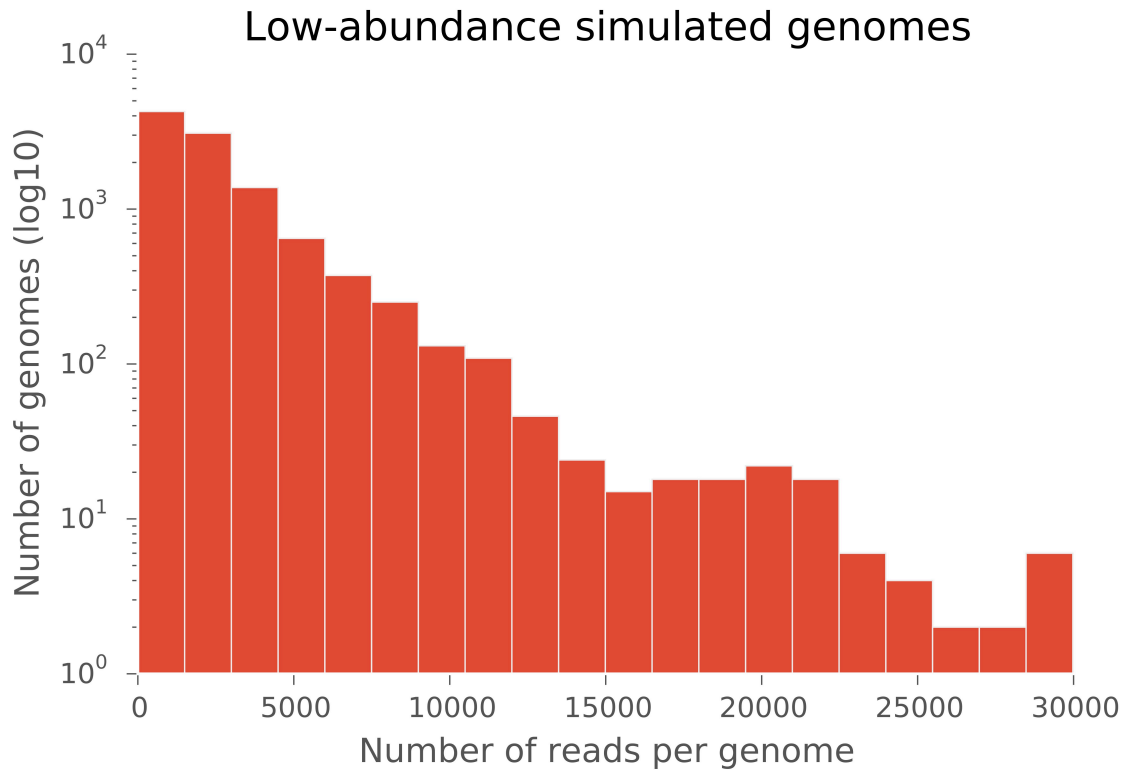

122

123 **Figure 1.** A frequency histogram of the number of reads simulated for the set of low-abundance ge-  
124 nomes (10,425 genomes, 1 – 30,000 reads each). The horizontal axis shows the number of reads simu-  
125 lated per genome, and the vertical axis indicates the number of genomes simulated at that depth (log<sub>10</sub>).  
126 An additional set of 214 genomes were used to simulate at least 100,000 reads each.

127

128 In the second testing approach, a set of six organisms identified in the public repositories that were se-  
129 quenced recently enough as to not be included in any of the reference databases. These “taxonomically  
130 novel” genomes did not have any other members of their species present in the reference database. Three  
131 of the six “taxonomically novel” test datasets were simulated from complete genome assemblies at 5X,  
132 two were raw Illumina reads, and one was an unassembled PacBio dataset (Table 1). While these da-

133 taset may contain contaminating or misidentified organisms, each analytical method will be challenged  
134 equally by those potentially confounding factors.

135

136 For both the single-isolate samples and the 500 sets of simulated reads (100,000 reads each), simulated  
137 150bp single-ended reads were generated using the ART next-generation sequencing read simulator  
138 (v3.19.15) (Huang 2012) using the Illumina quality profile. For the single-isolate “taxonomically novel”  
139 test datasets, reads were generated at 5-fold coverage depth.

140

| NCBI Accession | Organism                              | Source            | Type     | Number of Simulated Reads |
|----------------|---------------------------------------|-------------------|----------|---------------------------|
| GCA_001045455  | Chryseobacterium sp. FH2              | Assembly          | Illumina | 132,905                   |
| GCA_001050135  | Cyclobacterium amurskyense KCTC-12363 | Assembly          | Illumina | 205,290                   |
| SRR2106399     | Leptolyngbya sp. Y-WT-2000            | Unassembled reads | Illumina | 11,060,814                |
| GCA_001258055  | Nautella italica CECT7645             | Assembly          | Illumina | 134,905                   |
| SRR2106282     | Thermincola ferriacetica Z-0001       | Unassembled reads | Illumina | 2,053,515                 |
| SRR2080278     | Wenzhouxiangella marina KCTC42284     | Unassembled reads | PacBio   | 163,476                   |

141

142 **Table 1.** Datasets used to assess the performance of each method in identifying organisms not contained  
143 in the reference database.

144

### 145 3.2.5. Statistical Summary

146 Kraken, Seed-Kraken, Clark, and One Codex provide taxonomic assignments for every read in a dataset,  
147 while Metaphlan and GOTTCHA provide an overall summary of dataset composition. Kraken, Seed-



148 Kraken, Clark, and One Codex were evaluated with the complete set of 50 million simulated reads,  
149 while all methods were evaluated on the six single-organism “taxonomically novel” datasets. Each  
150 method was executed on an equivalent AWS EC2 instance (r3.8xlarge) with 12 processors available for  
151 parallelized steps.

152

153 For the set of 50 million simulated reads, the accuracy of classification by One Codex, Seed-Kraken and  
154 Kraken was evaluated on a read-by-read basis. One Codex was run with both the One Codex Database  
155 (~40,000 genomes) and the One Codex RefSeq Database (~8,000 genomes). Kraken was run with both  
156 the full database and the “Minikraken” database. Those methods assign an NCBI taxonomic identifier  
157 (‘taxid’) to each read. Given the known source of each read, the accuracy of the classification can be as-  
158 sessed across all levels of the taxonomy. For example, a read simulated from *E. coli* O157:H7 str. Sakai  
159 may be assigned to *Escherichia fergusonii*, in which case the species-level assignment is incorrect, while  
160 the genus-level assignment is correct (as is the family-, order-, class-, and phylum-). Similarly, a read  
161 simulated from *E. coli* O157:H7 str. Sakai may be assigned to *Enterobacteriaceae*, in which case the  
162 family-level assignment is correct and there is no assignment at the rank of genus, species, or strain.

163

164 Accuracy metrics were calculated as follows: Let A be the number of reads assigned correctly at a given  
165 taxonomic rank, B be the number of reads with any assignment at the given rank, C be the number of  
166 reads classified incorrectly at a less-specific rank, and D be the total number of reads. Sensitivity is de-  
167 fined as  $A / D$ , or the proportion of all reads assigned correctly at the given rank. Specificity is defined  
168 as  $A / (B + C)$ , following Wood et al. (2015). For a set of reads simulated from *E. coli*, the classification  
169 of a read as *E. coli* would increase both species-level sensitivity and species-level specificity, classifica-  
170 tion as *Escherichia* would not increase species-level sensitivity, but it would increase species-level spec-

171 ificity, and classification as *E. fergusonii* would decrease both species-level sensitivity and species-level  
172 specificity.

173

174 Metaphlan and GOTTCHA do not assign taxa to individual reads, but rather predict the proportion of the  
175 dataset composed of different taxa. Therefore the specificity presented for those methods is the propor-  
176 tion assigned to the correct taxon at a given rank and no sensitivity metrics are reported.

177

### 178 **3.3 One Codex User Interface**

179 Samples are uploaded in FASTA or FASTQ format to the One Codex platform through a graphical up-  
180 load tool with both drag-and-drop and folder navigation options. A command-line tool and API are also  
181 available for large-volume data upload (<https://docs.onecodex.com>). Once uploaded, reads are taxonom-  
182 ically classified and the interactive report is populated and linked to the user's account (Supplemental  
183 Figures 1 and 2). The One Codex platform can be accessed at <https://www.onecodex.com>, and can be  
184 used freely to analyze public data.

185

### 186 **3.4 Availability**

187 Simulated datasets are available in a compressed FASTQ file containing 50M simulated reads at  
188 [www.onecodex.com/data/papers/minot-krumm-greenfield-2015/simulated.reads.fastq.gz](http://www.onecodex.com/data/papers/minot-krumm-greenfield-2015/simulated.reads.fastq.gz). The true taxo-  
189 nomic origin of each read is encoded in the FASTQ header as an NCBI taxid, allowing other researchers  
190 to replicate this analytical framework. One Codex is freely available for public use by academic re-  
191 searchers at <https://www.onecodex.com>. Supplemental Figures 1 and 2 show example screenshots of the  
192 One Codex platform.

193

## 194 **4 RESULTS**

195

#### 196 4.1 Read-level Accuracy

197 We first summarized the accuracy of each tool on a per-read basis. One Codex showed the highest de-  
198 gree of sensitivity and specificity at each rank and the performance of the other methods varied with the  
199 database and assignment method used. It is notable that although the content of the Kraken and Seed-  
200 Kraken databases was identical, Seed-Kraken was more sensitive and less specific than Kraken at all  
201 taxonomic levels (Table 2 and Figure 2). While the reduced Minikraken database resulted in lower sen-  
202 sitivity and higher specificity than the full Kraken database, the reduced One Codex RefSeq Database  
203 was less accurate using both metrics. As noted above, ~78% of the simulated genomes were indexed in  
204 the One Codex Database, while 8.8% were indexed in the One Codex RefSeq Database. Accuracy met-  
205 rics were also calculated for One Codex and One Codex RefSeq using only the subset of reads simulated  
206 from genomes not indexed in those databases. Species-level sensitivity and specificity for One Codex  
207 was 0.532 and 0.875, respectively, while One Codex RefSeq was 0.511 and 0.835. Similar comparisons  
208 could not be made for other methods without better characterization of the genome accessions used to  
209 create those reference indices.

210

#### Sensitivity

| Rank         | Kraken | Minikraken | Seed-Kraken | Clark | One Codex    | One Codex - RefSeq |
|--------------|--------|------------|-------------|-------|--------------|--------------------|
| superkingdom | 0.743  | 0.714      | 0.758       | 0.682 | <b>0.951</b> | 0.748              |
| phylum       | 0.742  | 0.713      | 0.755       | 0.681 | <b>0.943</b> | 0.745              |
| class        | 0.740  | 0.711      | 0.752       | 0.679 | <b>0.906</b> | 0.743              |
| order        | 0.737  | 0.709      | 0.748       | 0.678 | <b>0.903</b> | 0.740              |
| family       | 0.734  | 0.706      | 0.743       | 0.675 | <b>0.897</b> | 0.737              |
| genus        | 0.694  | 0.662      | 0.711       | 0.668 | <b>0.852</b> | 0.704              |
| species      | 0.546  | 0.516      | 0.574       | 0.605 | <b>0.621</b> | 0.563              |
| strain       | 0.030  | 0.027      | 0.031       | 0.000 | <b>0.118</b> | 0.080              |

**Specificity**

| Rank         | Kraken       | Minikraken   | Seed-Kraken | Clark | One Codex    | One Codex - RefSeq |
|--------------|--------------|--------------|-------------|-------|--------------|--------------------|
| superkingdom | <b>0.999</b> | <b>0.999</b> | 0.996       | 0.996 | <b>0.999</b> | 0.994              |
| phylum       | 0.997        | <b>0.998</b> | 0.994       | 0.994 | <b>0.998</b> | 0.992              |
| class        | 0.995        | <b>0.997</b> | 0.991       | 0.992 | <b>0.997</b> | 0.990              |
| order        | 0.993        | <b>0.996</b> | 0.987       | 0.989 | <b>0.996</b> | 0.988              |
| family       | 0.989        | 0.994        | 0.982       | 0.986 | <b>0.996</b> | 0.984              |
| genus        | 0.980        | 0.991        | 0.970       | 0.975 | <b>0.995</b> | 0.974              |
| species      | 0.893        | 0.936        | 0.869       | 0.883 | <b>0.979</b> | 0.864              |
| strain       | 0.157        | 0.203        | 0.114       | 0.000 | <b>0.824</b> | 0.181              |

211

212 **Table 2.** Summary of accuracy for six methods identifying the taxonomic origin of 50 million short se-  
 213 quence reads simulated from 10,639 microbial genomes. The maximum value at each rank is bolded.

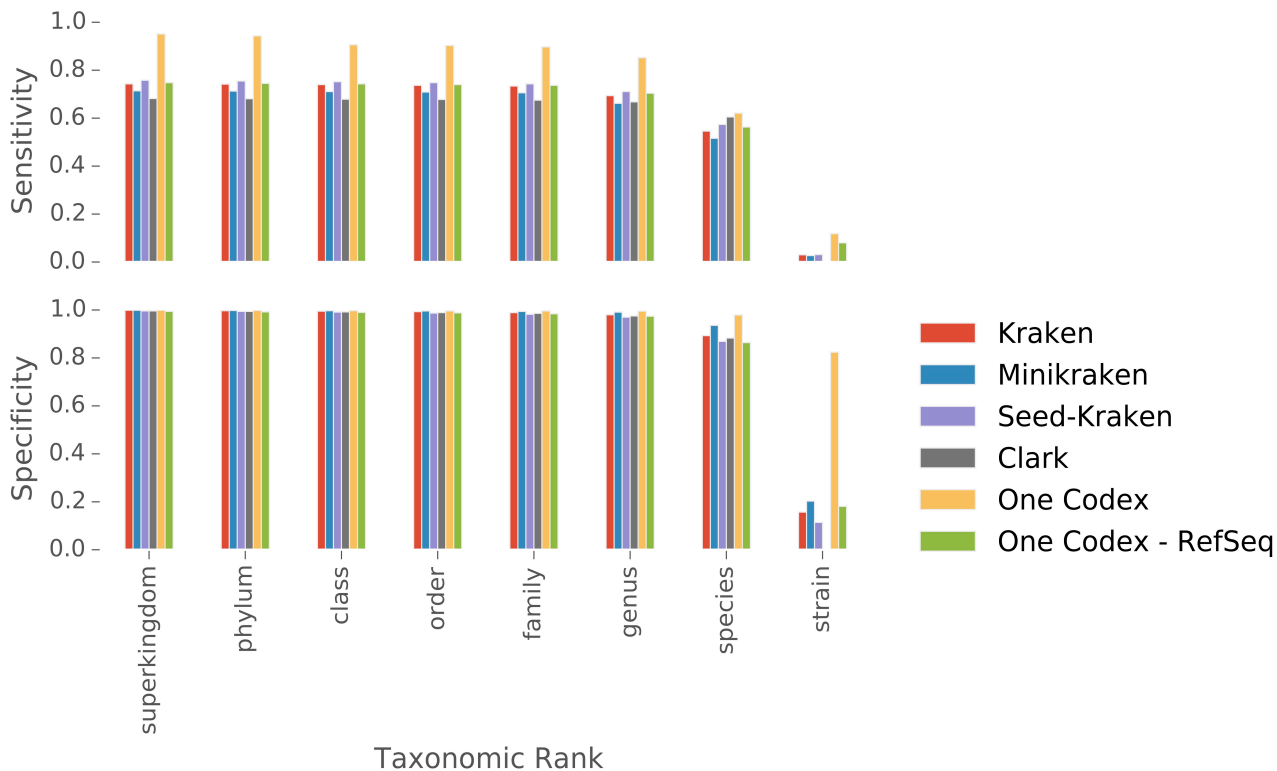

214

215 **Figure 2.** Summary of accuracy for six methods identifying the taxonomic origin of 50 million short se-  
216 quence reads simulated from 10,639 microbial genomes.

217

## 218 **4.2 Species-level presence/absence accuracy**

219 We characterized the species-level accuracy of each classifier using a receiver operating characteristic  
220 (ROC) curve (Fig. 3). The ROC curve displays the true positive rate (TPR) and false positive rate (FPR)  
221 of species presence/absence across a range of read thresholds. Each dataset can be summarized as a set  
222 of species, each detected with a certain number of reads, and each marked as truly present, or truly ab-  
223 sent. For any given number of reads, the species detected with at least that number of reads is marked as  
224 present, and any species with fewer than that number of reads is marked as absent. The TPR is calculat-  
225 ed for a given read threshold as the number of true positive detections divided by the total number of  
226 total positives, and the FPR is calculated as the number of true negatives divided by the number of total  
227 negatives. The ROC curve for each method is shown in Figure 3.

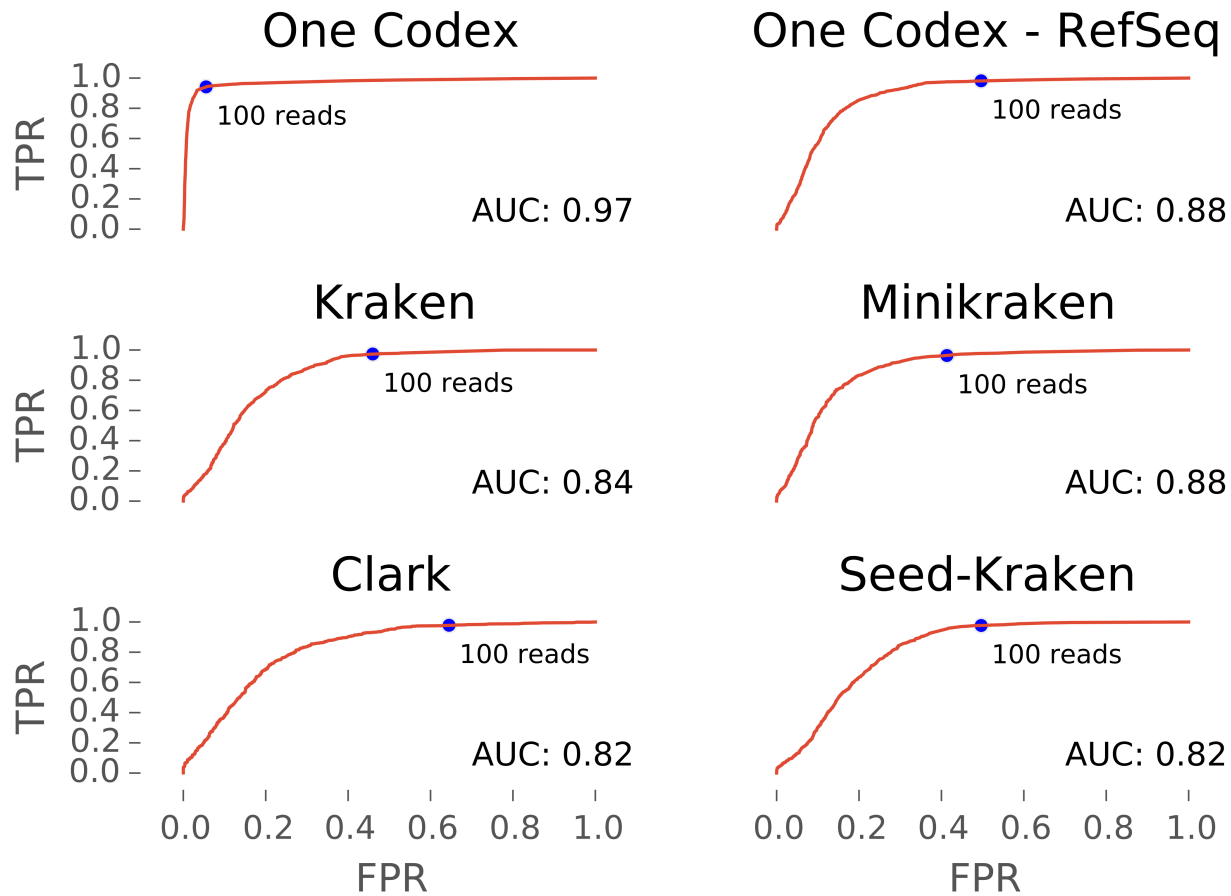

228

229 **Figure 3.** ROC curve displaying the performance of six taxonomic classification methods as species-  
230 level binary classifiers. Horizontal axis shows the False Positive Rate, and the vertical axis shows the  
231 True Positive Rate. Area Under Curve (AUC) is inset. The FPR and TPR are shown for a read cutoff  
232 value of 100 detected reads (150bp), which corresponds to roughly 0.003X coverage of a typical bacteri-  
233 al genome.

234

### 235 4.3 “Taxonomically Novel” Accuracy

236 Each of the “taxonomically novel” test datasets was selected because that species was not present in the  
237 reference database for any method. Due to the relative taxonomic novelty of these organisms, the closest

238 match found by any method for these datasets was either at the genus-, family-, or order-level. For ex-  
239 ample, the most taxonomically similar reference organisms to *Wenzhouxiangella marina* KCTC 42284  
240 (SRR2080278) share the order *Chromatiales*, as the family *Wenzhouxiangellaceae* was only proposed  
241 very recently (Wang 2015). Sensitivity and specificity metrics are shown in Table 3 alongside the rank  
242 at which the closest correct match was found by any method. GOTTCHA did not report any taxa above  
243 its threshold of detection for the three datasets showing ‘0’ in Table 3, and we provided the authors of  
244 that method with those datasets in order to confirm those results. Using the GOTTCHA ‘v20150825’  
245 database they reported that dataset GCA\_001045455 was assigned correctly at the family level and  
246 above, dataset SRR2106399 was assigned correctly at the order level, and dataset SRR2080278 did not  
247 have any assignments above the threshold of reporting (personal communication). Across all six da-  
248 taset, One Codex displayed the highest sensitivity (0.391) while One Codex - RefSeq had the highest  
249 specificity (0.696).

| Dataset            | GCA_001045455    | GCA_001050135  | SRR2106399   | GCA_001258055    | SRR2106282  | SRR2080278   |       |
|--------------------|------------------|----------------|--------------|------------------|-------------|--------------|-------|
| Assignment         | Chryseobacterium | Cyclobacterium | Leptolyngbya | Rhodobacteraceae | Thermincola | Chromatiales |       |
| Rank               | Genus            | Genus          | Genus        | Family           | Genus       | Order        |       |
| Sensitivity        |                  |                |              |                  |             |              | Mean  |
| Kraken             | 0                | 0.149          | 0            | 0.203            | 0.831       | 0.005        | 0.198 |
| Minikraken         | 0                | 0.096          | 0            | 0.093            | 0.787       | 0.001        | 0.163 |
| Seed-Kraken        | 0                | 0.211          | 0.001        | 0.352            | 0.836       | 0.004        | 0.234 |
| Clark              | 0                | 0.065          | 0.001        | 0.072            | 0.595       | 0.002        | 0.122 |
| One Codex          | 0.313            | 0.225          | 0.01         | 0.965            | 0.827       | 0.005        | 0.391 |
| One Codex - RefSeq | 0.191            | 0.142          | 0.002        | 0.244            | 0.83        | 0.005        | 0.236 |
| Metaphlan          | -                | -              | -            | -                | -           | -            | -     |
| GOTTCHA            | -                | -              | -            | -                | -           | -            | -     |
| Specificity        |                  |                |              |                  |             |              | Mean  |
| Kraken             | 0                | 0.961          | 0.013        | 0.920            | 0.995       | 0.102        | 0.499 |
| Minikraken         | 0                | 0.985          | 0.04         | 0.943            | 0.998       | 0.266        | 0.539 |
| Seed-Kraken        | 0                | 0.932          | 0.207        | 0.947            | 0.993       | 0.156        | 0.539 |
| Clark              | 0                | 0.939          | 0.002        | 0.823            | 0.991       | 0.011        | 0.461 |
| One Codex          | 0.920            | 0.927          | 0.109        | 0.999            | 0.988       | 0.082        | 0.671 |
| One Codex - RefSeq | 0.928            | 0.919          | 0.186        | 0.942            | 0.995       | 0.208        | 0.696 |
| Metaphlan          | 0.935            | 1.000          | 0            | 1.000            | 0           | 0            | 0.489 |
| GOTTCHA            | 0                | 1.000          | 0            | 1.000            | 0.971       | 0            | 0.495 |

251

252 **Table 3.** Accuracy of prediction for six organisms not found in any of the reference databases used by  
 253 these methods. Note that Metaphlan and GOTTCHA results are presented as specificity metrics, as the  
 254 abundance metrics reported by those methods are relative to the total classified composition of each  
 255 sample (rather than the number of input reads).

256

#### 257 4.4 Analysis Time

258 The time required for completing analysis of the 50M simulated reads for each method is presented in  
 259 Table 4 (GOTTCHA and Metaphlan are not shown because they were not run on the read-level evalua-  
 260 tion datasets). Although the complete set of 50M simulated reads were run in parallel batches of 10M



261 reads, the time presented here is the cumulative processing time, rather than the shorter start-to-finish  
262 period of parallelized execution across multiple computational nodes. All methods were run with 12  
263 processors on equivalent computational resources. Of these read-classification methods, Minikraken and  
264 Clark were the most rapid, and Seed-Kraken was the slowest.

265

|                    | Analysis Time (min:sec) |
|--------------------|-------------------------|
| Clark              | 04:50                   |
| Minikraken         | 05:15                   |
| Kraken             | 06:26                   |
| One Codex          | 22:13                   |
| One Codex - RefSeq | 21:49                   |
| Seed-Kraken        | 45:58                   |

266

267 **Table 4.** Computational time required for each method to classify the 50M simulated reads.

268

## 269 5 DISCUSSION

270

271 The widespread adoption of high-throughput sequencing for the detailed characterization of mixed mi-  
272 crobial samples presents an immense opportunity and challenge to the field of microbial genomics. Alt-  
273 hough genomic sequences can be used pinpoint the organisms in a sample down to the level of a single  
274 strain, accurate detection of each strain completely depends on the ability of a computational method to  
275 search for genomic sequences across the extent of known life. Not only does the volume of microbial  
276 reference genomes exceed that of the human genome by many-fold (181 billion bases of prokaryotic ge-  
277 nome sequence can be found in NCBI as of Aug. 25, 2015), but the sequences found in wild-caught mi-  
278 crobes may differ significantly from those of their domesticated relatives (Rinke, et al. 2013). In the face  
279 of these serious computational challenges, a large panel of computational methods have been proposed  
280 recently to perform the task of microbial detection (Oulas, 2015). However, it can be prohibitively diffi-

281 cult for a microbial researcher to rigorously evaluate all of the possible options in order to select the  
282 most appropriate method. To address that challenge, we have provided a comprehensive analysis of the  
283 performance of a wide range of the most widely adopted analytical methods. Moreover, we have made  
284 the test data and analytical framework available for others to evaluate future methods against a common  
285 reference. We believe that the large volume (over 50M simulated reads), phylogenetically complexity  
286 (10,639 randomly selected source organisms), and analytical portability (NCBI taxonomic identifiers  
287 recorded within read headers), makes this dataset a valuable resource for the research community.

288

289 One Codex provides the highest degree of accuracy, both sensitivity and specificity, across all taxonom-  
290 ic ranks, with 62.1% per-read sensitivity and 98.7% per-read specificity at the species-level (Table 2).  
291 The absolute performance of any detection method as a binary classifier was summarized by ROC anal-  
292 ysis, showing that One Codex had the best performance (AUC: 0.97), with other methods performing  
293 roughly equally (AUC: 0.82 – 0.88). For purposes of illustration, the accuracy of each method was  
294 shown at an absolute abundance cutoff of 100 reads (Fig. 3). At that threshold for calling a species as  
295 present in a sample, One Codex showed a much lower FPR than other methods, suggesting that the larg-  
296 er set of reference organisms in the One Codex database serves to significantly reduce the number of  
297 species-level false positive detections with that method.

298

299 The array of methods evaluated here allows for an intriguing comparison of the effect of reference data-  
300 base and classification algorithm on overall performance. Kraken and Seed-Kraken use differing as-  
301 signment algorithms and a common reference database, with Seed-Kraken providing higher sensitivity  
302 and Kraken providing higher specificity. This finding replicates similar precision/sensitivity trade-off  
303 that was observed previously for Seed-Kraken at the species-level (Břinda, 2015). While the perfor-  
304 mance of both Kraken and One Codex is presented with two alternate databases, the smaller Minikraken

305 database was constructed by selecting a smaller number of kmers per organism, and the smaller One  
306 Codex RefSeq database was constructed by selecting a restricted number of reference organisms, so the  
307 resulting differences in sensitivity and specificity are not directly comparable. As the genomes encoun-  
308 tered in real-world metagenomic samples rarely exactly match those found in reference databases, it is  
309 important to quantify the accuracy of detection for ‘out-of-reference’ genomes. Considering only the  
310 reads simulated from reads not found in those reference databases, the sensitivity and specificity of de-  
311 tection for One Codex was 0.532 and 0.875, respectively, while One Codex RefSeq was 0.511 and  
312 0.835, reflecting only a modest decline in performance for that large group of ‘out-of-reference’ ge-  
313 nomes. Further research into the effect of reference database composition on predictive accuracy could  
314 conceivably enable the creation of classification methods with smaller computational footprints and im-  
315 proved performance.

316  
317 The largest difference in performance between classification methods can be seen in the “taxonomically  
318 novel” test datasets. Each method detects a different subset of organisms, indicating that the composition  
319 of each reference database highly determines the ability of a method to detect a given organism. Overall,  
320 One Codex had the highest average sensitivity (39.1%), which was far higher than the next-most sensi-  
321 tive methods One Codex RefSeq (23.6%) and Seed-Kraken (23.4%). This set of six datasets is a useful  
322 demonstration of the fundamental challenge of accurately classifying sequences from organisms not  
323 found in any reference database. Even when the closest possible rank is at the genus or above, each  
324 method varies widely in its ability to assign sequences correctly to that rank. The highly sensitive per-  
325 formance of One Codex against these samples suggests that a large and comprehensive reference data-  
326 base not only enables more accurate detection of well-characterized taxa, but also enables more accurate  
327 detection of taxonomically-novel and phylogenetically divergent organisms.

328

329 By evaluating a wide range of taxonomic classification algorithms against a large and complex set of  
330 10,639 simulated genomes, as well as a set of six recently sequenced and phylogenetically-distinct or-  
331 ganisms, we have generated important insight into the ability of microbial researchers to accurately  
332 characterize unknown metagenomic samples. Most notably, because Kraken, Minikraken, One Codex,  
333 and One Codex RefSeq all classify reads using taxonomically-unique 31mers, the differing performance  
334 of these methods is undoubtedly due to the much different composition of those databases, with larger  
335 reference databases leading to greater analytical accuracy. These results show the value of continually  
336 expanding reference database collections in order to more accurately classify the vast pool of unknown,  
337 unsequenced microbial ‘dark’ matter (Rinke 2013), as well as the specific strains of well-known patho-  
338 gens that cause human disease.

339

## 340 6 ACKNOWLEDGEMENTS

341 *Conflict of Interest:* Authors are employed by Reference Genomics, Inc., which develops the One Codex  
342 platform.

343

## 344 7 REFERENCES

- 345 Ames SK, Hysom DA, Gardner SN, Lloyd GS, Gokhale MB, Allen JE. Scalable metagenomic taxono-  
346 my classification using a reference genome database. *Bioinformatics*. 2013; 29(18):2253-60.  
347 Břinda K, Sykulski M, Kucherov G. Spaced seeds improve k-mer-based metagenomic classification.  
348 *Bioinformatics*. 2015 Jul 25; pii: btv419  
349 Caboche S, Audebert C, Hot D. High-Throughput Sequencing, a Versatile Weapon to Support Genome-  
350 Based Diagnosis in Infectious Diseases: Applications to Clinical Bacteriology. *Pathogens*. 2014 Apr  
351 2;3(2):258-79. doi: 10.3390/pathogens3020258.  
352 Grad YH, Lipsitch M. Epidemiologic data and pathogen genome sequences: a powerful synergy for pub-  
353 lic health. *Genome Biol*. 2014 Nov 18;15(11):538. doi: 10.1186/s13059-014-0538-4.  
354 Huang W, Li L, Myers JR, Marth GT. ART: a next-generation sequencing read simulator. *Bioinformat-  
355 ics*. 2012 Feb 15;28(4):593-4. doi: 10.1093/bioinformatics/btr708.  
356 Liu B, Gibbons T, Ghodsi M, Treangen T, Pop M. Accurate and fast estimation of taxonomic profiles  
357 from metagenomic shotgun sequences. *BMC Genomics*. 2011;12 Suppl 2:S4. doi: 10.1186/1471-2164-  
358 12-S2-S4.

- 359 Mavromatis K, Ivanova N, Barry K, Shapiro H, Goltsman E, McHardy AC, et al. Use of simulated data  
360 sets to evaluate the fidelity of metagenomic processing methods. *Nat Methods*. 2007 Jun;4(6):495-500.
- 361 Mitra S, Rupek P, Richter DC, Urich T, Gilbert JA, Meyer F, et al. Functional analysis of metagenomes  
362 and metatranscriptomes using SEED and KEGG. *BMC Bioinformatics*. 2011 Feb 15;12 Suppl 1:S21.  
363 doi: 10.1186/1471-2105-12-S1-S21.
- 364 Naccache SN, Federman S, Veeraraghavan N, Zaharia M, Lee D, Samayoa E, et al. A cloud-compatible  
365 bioinformatics pipeline for ultrarapid pathogen identification from next-generation sequencing of clinical  
366 samples. *Genome Res*. 2014 Jul;24(7):1180-92. doi: 10.1101/gr.171934.113.
- 367 Neimark, J. Quick DNA Scans Could Ensure Food Is Safe to Eat. *Scientific American*. 2015 Feb.
- 368 Oulas A, Pavloudi C, Polymenakou P, Pavlopoulos GA, Papanikolaou N, Kotoulas G, et al. Meta-  
369 genomics: Tools and Insights for Analyzing Next-Generation Sequencing Data Derived from Biodiversity  
370 Studies. *Bioinform Biol Insights*. 2015 May 5;9:75-88. doi: 10.4137/BBI.S12462.
- 371 Rinke C, Schwientek P, Sczyrba A, Ivanova NN, Anderson IJ, Cheng JF, et al. Insights into the phylog-  
372 eny and coding potential of microbial dark matter. *Nature*. 2013 Jul 25;499(7459):431-7. doi:  
373 10.1038/nature12352.
- 374 Segata N, Waldron L, Ballarini A, Narasimhan V, Jousson O, Huttenhower C. Metagenomic microbial  
375 community profiling using clade-specific marker genes. *Nat Methods*. 2012 Jun 10;9(8):811-4. doi:  
376 10.1038/nmeth.2066.
- 377 Wang G, Tang M, Li T, Dai S, Wu H, Chen C, et al. *Wenzhouxiangella marina* gen. nov, sp. nov, a ma-  
378 rine bacterium from the culture broth of *Picochlorum* sp. 122, and proposal of *Wenzhouxiangellaceae*  
379 fam. nov. in the order *Chromatiales*. *Antonie Van Leeuwenhoek*. 2015 Jun;107(6):1625-32. doi:  
380 10.1007/s10482-015-0458-7.
- 381 Wood DE, Salzberg SL. Kraken: ultrafast metagenomic sequence classification using exact alignments.  
382 *Genome Biol*. 2014 Mar 3;15(3):R46. doi: 10.1186/gb-2014-15-3-r46.

383 8 SUPPLEMENTAL FIGURES

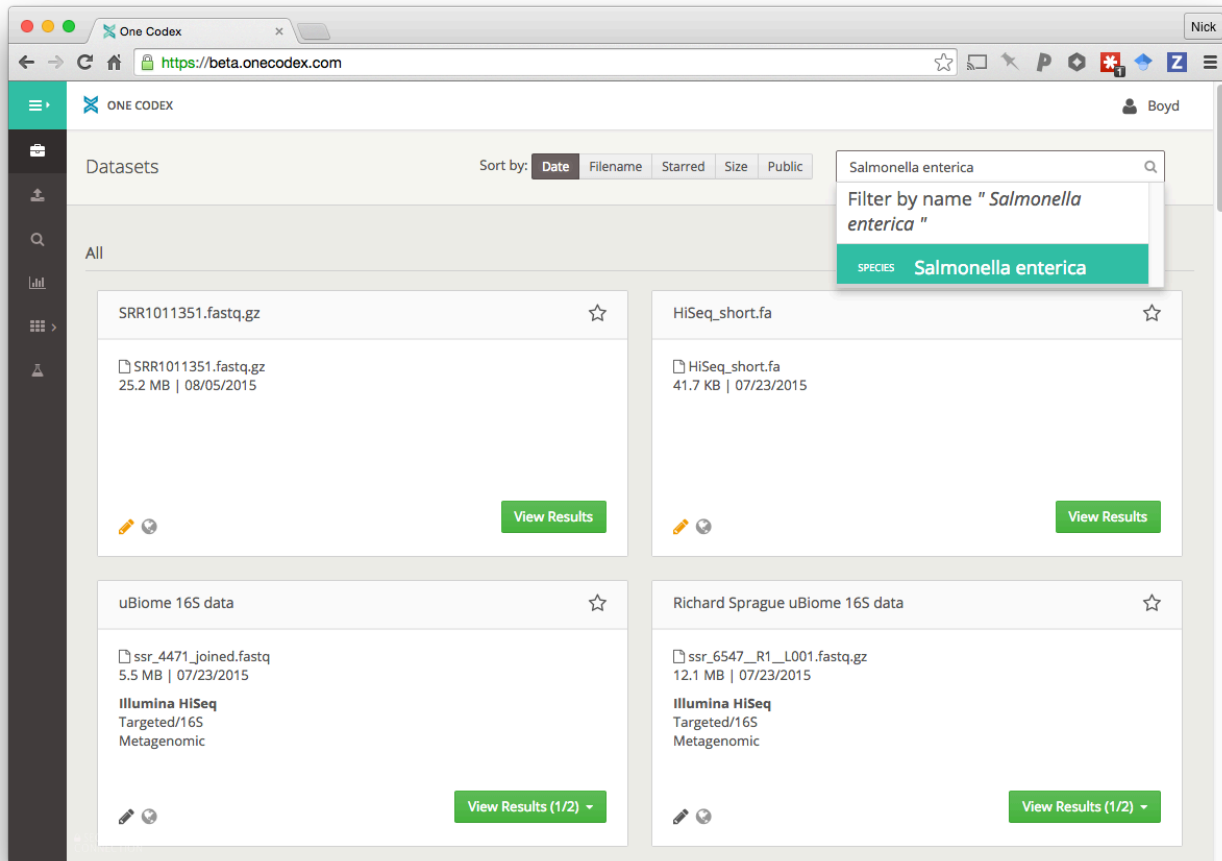

384

385 Supplemental Figure 1. Example of dataset browser page on the One Codex platform. Datasets are orga-  
386 nized by metadata (e.g. name, date, size, environment, platform, etc.) and user-defined tags. Figure dis-  
387 plays an example of the user searching for datasets containing *Salmonella enterica* above a specified  
388 abundance threshold.

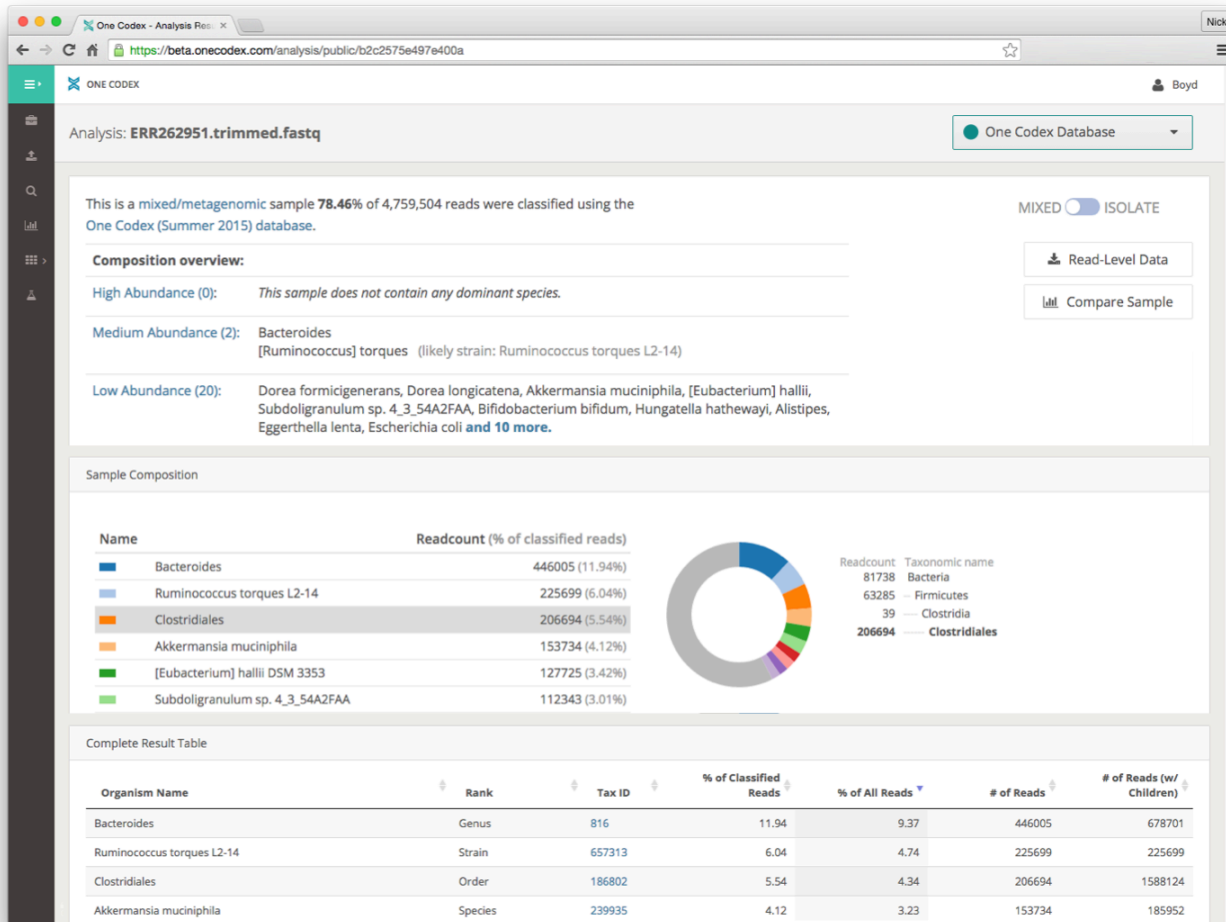

389

390 Supplemental Figure 2. Example of metagenomic analysis display for a single sample. Users have the  
391 option of downloading read-level assignments or dataset summaries, comparing the abundance profile  
392 against that of other samples, and navigating to additional analyses for each dataset.
